# Supplementary material
Source: PubMed Central journal article supplement (PMC2975221)
Supplement: supp_M110.120402_SUPPLdATA.pdf [file supp_M110.120402_SUPPLdATA.pdf]

## SUPPLEMENTAL DATA

### BcsK<sub>C</sub> is an essential protein for the Type VI secretion system activity in *Burkholderia cenocepacia* and forms an outer membrane complex with BcsL<sub>B</sub>

Aubert, Daniel<sup>1</sup>, Douglas K. MacDonald<sup>1</sup>, and Miguel A. Valvano<sup>1,2</sup>

Table S1

#### Strains and plasmids

| Strain or plasmid                              | Relevant characteristics <sup>a</sup>                                                                                                                                                                       | Source and/or reference |
|------------------------------------------------|-------------------------------------------------------------------------------------------------------------------------------------------------------------------------------------------------------------|-------------------------|
| <i>B. cenocepacia</i>                          |                                                                                                                                                                                                             |                         |
| K56-2                                          | ET12 clone related to J2315, CF clinical Isolate                                                                                                                                                            | <sup>b</sup> BCRRC, (1) |
| K56-2 $\Delta$ atsR                            | Deletion of <i>atsR</i> in K56-2                                                                                                                                                                            | This study              |
| K56-2 $\Delta$ atsR $\Delta$ T6SS              | Deletion of the T6SS cluster in K56-2 $\Delta$ atsR                                                                                                                                                         | This study              |
| K56-2 $\Delta$ atsR $\Delta$ TU1               | Deletion of the T6SS transcriptional unit #1 in K56-2 $\Delta$ atsR                                                                                                                                         | This study              |
| K56-2 $\Delta$ atsR $\Delta$ TU2               | Deletion of the T6SS transcriptional unit #2 in K56-2 $\Delta$ atsR                                                                                                                                         | This study              |
| K56-2 $\Delta$ atsR $\Delta$ TU3               | Deletion of the T6SS transcriptional unit #3 in K56-2 $\Delta$ atsR                                                                                                                                         | This study              |
| K56-2 $\Delta$ atsR $\Delta$ bcsM              | Deletion of <i>bcsM</i> in K56-2 $\Delta$ atsR                                                                                                                                                              | This study              |
| K56-2 $\Delta$ atsR $\Delta$ bcsL <sub>B</sub> | Deletion of <i>bcsL<sub>B</sub></i> in K56-2 $\Delta$ atsR                                                                                                                                                  | This study              |
| K56-2 $\Delta$ atsR $\Delta$ bcsK <sub>C</sub> | Deletion of <i>bcsK<sub>C</sub></i> in K56-2 $\Delta$ atsR                                                                                                                                                  | This study              |
| K56-2 $\Delta$ atsR $\Delta$ hcp               | Deletion of <i>hcp</i> in K56-2 $\Delta$ atsR                                                                                                                                                               | This study              |
| K56-2 $\Delta$ atsR $\Delta$ bcsI <sub>E</sub> | Deletion of <i>bcsI<sub>E</sub></i> in K56-2 $\Delta$ atsR                                                                                                                                                  | This study              |
| K56-2 $\Delta$ atsR $\Delta$ bcsH <sub>F</sub> | Deletion of <i>bcsH<sub>F</sub></i> in K56-2 $\Delta$ atsR                                                                                                                                                  | This study              |
| K56-2 $\Delta$ atsR $\Delta$ bcsG <sub>G</sub> | Deletion of <i>bcsG<sub>G</sub></i> in K56-2 $\Delta$ atsR                                                                                                                                                  | This study              |
| K56-2 $\Delta$ atsR $\Delta$ bcsF <sub>H</sub> | Deletion of <i>bcsF<sub>H</sub></i> in K56-2 $\Delta$ atsR                                                                                                                                                  | This study              |
| K56-2 $\Delta$ atsR $\Delta$ bcsE <sub>A</sub> | Deletion of <i>bcsE<sub>A</sub></i> in K56-2 $\Delta$ atsR                                                                                                                                                  | This study              |
| <i>E. coli</i>                                 |                                                                                                                                                                                                             |                         |
| DH5 $\alpha$                                   | F <sup>-</sup> $\phi$ 80 <i>lacZ</i> M15 <i>endA1 recA1 supE44 hsdR17</i> (r <sub>K</sub> <sup>-</sup> m <sub>K</sub> <sup>+</sup> ) <i>deoR</i>                                                            | Laboratory stock        |
| SY327                                          | <i>thi-1 nupG supE44 gyrA96 relA1</i> $\Delta$ ( <i>lacZYA-argF</i> )U169, $\lambda$ - <i>araD</i> , $\Delta$ ( <i>lac pro</i> ) <i>argE</i> (Am) <i>recA56 rif<sup>R</sup> nalA</i> , $\lambda$ <i>pir</i> | (2)                     |
| BL21(DE3)                                      | F <sup>-</sup> <i>ompT hsdSB</i> (r <sub>B</sub> <sup>-</sup> m <sub>B</sub> <sup>-</sup> ) <i>gal dcm</i> (DE3)                                                                                            | Laboratory stock        |
| KEM5                                           | DH1 $\Delta$ <i>cyoA</i> , Cm <sup>R</sup>                                                                                                                                                                  | Kendra Maloney          |
| Plasmids                                       |                                                                                                                                                                                                             |                         |
| pBcsK <sub>C</sub>                             | <i>bcsK<sub>C</sub></i> in pME6000                                                                                                                                                                          | This study              |
| pBcsK <sub>C,40-189</sub>                      | <i>bcsK<sub>C,40-189</sub></i> in pME6000                                                                                                                                                                   | This study              |
| pBscK <sub>C</sub> -FLAG                       | <i>bcsK<sub>C</sub></i> in pEL-1, FLAG                                                                                                                                                                      | This study              |
| pBcsK <sub>C,40-189</sub> -FLAG                | <i>bcsK<sub>C,40-189</sub></i> in pEL-1, FLAG                                                                                                                                                               | This study              |
| pBcsK <sub>C</sub> T18                         | <i>bcsK<sub>C</sub></i> in pUT18 fused to N-terminus of T18 domain                                                                                                                                          | This study              |
| pBcsK <sub>C,38-62</sub> T18                   | <i>bcsK<sub>C,38-62</sub></i> in pUT18 fused to N-terminus of T18 domain                                                                                                                                    | This study              |
| pBcsK <sub>C,40-189</sub> T18                  | <i>bcsK<sub>C,40-189</sub></i> in pUT18 fused to N-terminus of T18 domain                                                                                                                                   | This study              |
| pBcsK <sub>C,63-87</sub> T18                   | <i>bcsK<sub>C,63-87</sub></i> in pUT18 fused to N-terminus of T18 domain                                                                                                                                    | This study              |

|                                          |                                                                                                                                       |               |
|------------------------------------------|---------------------------------------------------------------------------------------------------------------------------------------|---------------|
| pBcsK <sub>C<sub>88-112</sub></sub> T18  | <i>bcsK</i> <sub>C<sub>88-112</sub></sub> in pUT18 fused to N-terminus of T18 domain                                                  | This study    |
| pBcsK <sub>C<sub>113-137</sub></sub> T18 | <i>bcsK</i> <sub>C<sub>113-137</sub></sub> in pUT18 fused to N-terminus of T18 domain                                                 | This study    |
| pBcsK <sub>C<sub>138-162</sub></sub> T18 | <i>bcsK</i> <sub>C<sub>138-162</sub></sub> in pUT18 fused to N-terminus of T18 domain                                                 | This study    |
| pBcsK <sub>C<sub>163-187</sub></sub> T18 | <i>bcsK</i> <sub>C<sub>163-187</sub></sub> in pUT18 fused to N-terminus of T18 domain                                                 | This study    |
| pBcsK <sub>C<sub>188-212</sub></sub> T18 | <i>bcsK</i> <sub>C<sub>188-212</sub></sub> in pUT18 fused to N-terminus of T18 domain                                                 | This study    |
| pBcsK <sub>C<sub>213-237</sub></sub> T18 | <i>bcsK</i> <sub>C<sub>213-237</sub></sub> in pUT18 fused to N-terminus of T18 domain                                                 | This study    |
| pBcsK <sub>C<sub>213-496</sub></sub> T18 | <i>bcsK</i> <sub>C<sub>213-496</sub></sub> in pUT18 fused to N-terminus of T18 domain                                                 | This study    |
| pDA45                                    | pGPI-SceI with fragments flanking <i>hcp</i>                                                                                          | (3)           |
| pDAI-SceI                                | <i>ori</i> <sub>pBBR1</sub> , Tet <sup>R</sup> , <i>P</i> <sub>dhfr</sub> , <i>mob</i> <sup>+</sup> , expressing I-SceI               | (4)           |
| pDelatsR                                 | pGPI-SceI with fragments flanking the <i>atsR</i>                                                                                     | This study    |
| pDelbcsE <sub>A</sub>                    | pGPI-SceI with fragments flanking <i>bcsE</i> <sub>A</sub>                                                                            | This study    |
| pDelbcsF <sub>H</sub>                    | pGPI-SceI with fragments flanking <i>bcsF</i> <sub>H</sub>                                                                            | This study    |
| pDelbcsG <sub>G</sub>                    | pGPI-SceI with fragments flanking <i>bcsG</i> <sub>G</sub>                                                                            | This study    |
| pDelbcsH <sub>F</sub>                    | pGPI-SceI with fragments flanking <i>bcsH</i> <sub>F</sub>                                                                            | This study    |
| pDelbcsI <sub>E</sub>                    | pGPI-SceI with fragments flanking <i>bcsI</i> <sub>E</sub>                                                                            | This study    |
| pDelbcsK <sub>C</sub>                    | pGPI-SceI with fragments flanking <i>bcsK</i> <sub>C</sub>                                                                            | This study    |
| pDelbcsL <sub>B</sub>                    | pGPI-SceI with fragments flanking <i>bcsL</i> <sub>B</sub>                                                                            | This study    |
| pDelbcsM                                 | pGPI-SceI with fragments flanking <i>bcsM</i>                                                                                         | This study    |
| pDelTU1                                  | pGPI-SceI with fragments flanking the transcriptional unit #1                                                                         | This study    |
| pDelTU2                                  | pGPI-SceI with fragments flanking the transcriptional unit #2                                                                         | This study    |
| pDelTU3                                  | pGPI-SceI with fragments flanking the transcriptional unit #3                                                                         | This study    |
| pDelT6SS                                 | pGPI-SceI with fragments flanking the T6SS cluster                                                                                    | This study    |
| pEL-1                                    | cloning vector, <i>ori</i> <sub>pBBR1</sub> , Tet <sup>R</sup> , <i>mob</i> <sup>+</sup> , <i>P</i> <sub>dhfr</sub> , FLAG(N) epitope | E. Lameignere |
| pGPI-SceI                                | <i>ori</i> <sub>R6K</sub> , ΩTp <sup>R</sup> , <i>mob</i> <sup>+</sup> , including an I-SceI restriction site                         | (4)           |
| pKT25                                    | pSU40 derivative for C-terminal fusion to T25, Kan <sup>R</sup> , <i>P</i> <sub>Lac</sub>                                             | Euromedex     |
| pME6000                                  | <i>ori</i> <sub>pBBR1</sub> , Tet <sup>R</sup> , <i>lacZ</i> , <i>mob</i> <sup>+</sup>                                                | S. Heeb       |
| pRK2013                                  | <i>ori</i> <sub>colE1</sub> , RK2 derivative, Kan <sup>R</sup> , <i>mob</i> <sup>+</sup> , <i>tra</i> <sup>+</sup>                    | (5)           |
| pT18BcsK <sub>C</sub>                    | <i>bcsK</i> <sub>C</sub> in pUT18C fused to C- terminus of T18 domain                                                                 | This study    |
| pT18BcsK <sub>C<sub>40-189</sub></sub>   | <i>bcsK</i> <sub>C<sub>40-189</sub></sub> in pUT18C fused to C- terminus of T18 domain                                                | This study    |
| pT25BcsL <sub>B</sub>                    | <i>bcsL</i> <sub>B</sub> in pKT25 fused to C-terminus of T25 domain                                                                   | This study    |
| pUT18                                    | pUC19 derivative for N-terminal fusion to T18, Amp <sup>R</sup> , <i>P</i> <sub>Lac</sub>                                             | Euromedex     |
| pUT18C                                   | pUC19 derivative for C-terminal fusion to T18, Amp <sup>R</sup> , <i>P</i> <sub>Lac</sub>                                             | Euromedex     |

<sup>a</sup> Amp<sup>R</sup>, ampicillin resistance, Tp<sup>R</sup>, trimethoprim resistance, Cm<sup>R</sup>, chloramphenicol resistance, Kan<sup>R</sup>, kanamycin resistance, Tet<sup>R</sup>, tetracycline resistance.

<sup>b</sup> BCRRC, *B. cepacia* Research and Referral Repository for Canadian CF Clinics.

Table S2

## Oligonucleotide primers

| Primer No. | 5'-3' Primer sequence             | Restriction enzyme* |
|------------|-----------------------------------|---------------------|
| 2115       | TTTCTAGAGTTCTGGGACACCTTCCACC      | XbaI                |
| 3060       | TTTTCTCGAGCGAGGACCAGGTGATTTTT     | XhoI                |
| 3061       | TTTTGAATTCGCGATATCGAACGCTATTT     | EcoRI               |
| 3062       | TACGTCTAGAAAAGCCTGCTGACAACCTG     | XbaI                |
| 3071       | TTTTCTCGAGGTGCTCGATCTCGAACTGC     | XhoI                |
| 3393       | TTTTGAGCTCTTATGAATTTGCCGTTTG      | SacI                |
| 3401       | TTTTGGTACCGACGGAGTGTTGAGATG       | KpnI                |
| 3456       | AAAAGCGGCCGCGTTTGCTGGTTCATCTCAA   | NotI                |
| 3457       | TTTTGAATTCGCCGTTTAGTATCGGACAG     | EcoRI               |
| 3466       | AAAAGAATTCGAGATGGCCAAGAAAGAAA     | EcoRI               |
| 3467       | TTTTGAATTCGGATCGAACTGAAATCGTG     | EcoRI               |
| 3468       | TTAGCGGCCGCGTGGAGACTTTCCTCAACC    | NotI                |
| 3469       | TTTTGCGGCCGCGCTGGGTTCGAATCGTTTCAT | NotI                |
| 3470       | TAAATCTAGAAAATGGACCGTCACTTCGTC    | XbaI                |
| 3483       | AAAATCTAGATATAGCGTGCTTCCGAGATG    | XbaI                |
| 3485       | AAAAGCGGCCGCGCACGCATGCAGTAAATCAA  | NotI                |
| 3700       | TTTTAAGCTTTTATGAATTTGCCGTTTG      | HindIII             |
| 3701       | TTATGGATCCTAACCAGCAAACGGCTGCGG    | BamHI               |
| 3716       | TTTTCTGCAGGAACCAGCAAACGGCTGC      | PstI                |
| 3717       | AAAAGGATCCCGCCAAGAAAGAAAGCATT     | BamHI               |
| 3718       | AAAAGAATTCGTCGTCATTCGCCGTCT       | EcoRI               |
| 3719       | TTTTTCTAGAGTTGAATTTGCCGTTTGGG     | XbaI                |
| 3778       | TTTTCTCGAGGGACCTGTTGACTTCCTTG     | XhoI                |
| 3779       | TTTTTCTAGAGCGTCTCATTGAATCCTGGT    | XbaI                |
| 3780       | GGTCAGGAGACACGAACCAT              | NA                  |
| 3781       | TGATCAAGACGTCGAACCTG              | NA                  |
| 3785       | TTTTTCTAGAGATCGTCAGGCGAAGAGC      | XbaI                |
| 3786       | TTTTCTCGAGTTTCTTTCTTGCCATCTC      | XhoI                |
| 3787       | ACGACAAGCTCGAGGATCTG              | XhoI                |
| 3788       | AAAAGAATTCGAAAGCTGCGTGGAAATCAG    | EcoRI               |
| 3944       | TTTTGCGGCCGCGGACCTGTTGACTTCCTTG   | NotI                |
| 3945       | TTTTGCGGCCGCGGTGAAGGGCTACCTGAT    | NotI                |
| 3947       | TTTTCTCGAGTAGCGAATCATGGACGATCT    | XhoI                |
| 3948       | TTTTTCTAGATGTTGAACACTTCCGCAGTC    | XbaI                |
| 3949       | TTTTGAATTCAGCGAATCATGGACGATCT     | EcoRI               |
| 3950       | TTTTCTCGAGTGTGAACTTCCGCAGTC       | XhoI                |
| 3951       | TTATCTCGAGGAGCAGTCGTAAACGCAAGA    | XhoI                |
| 3952       | TTTATCTAGACCGACGTACACGATCAAGAA    | XbaI                |
| 3966       | TAAATCTAGACTCGACCTGTTGACGACTT     | XbaI                |
| 3967       | TAAACTCGAGGCAACTGAAACCGCAACTGAC   | XhoI                |
| 3968       | TTTTGAATTCGCGCATTTCATCTGCAAGTC    | EcoRI               |
| 3969       | TCTTCTCGAGAAACGATAATTCGCGTTCGT    | XhoI                |
| 3970       | TCTTCTCGAGATGCTGACGCTGTACGACCT    | XhoI                |
| 3971       | TTTTTCTAGAGCCTGGAAGAACTCGAAGC     | XbaI                |
| 3972       | TTTTGAATTCATGCTGACGCTGTACGACCT    | EcoRI               |
| 3973       | TTTTCTCGAGGCTGGAAGAACTCGAAGC      | XhoI                |

|      |                                                |       |
|------|------------------------------------------------|-------|
| 3974 | TTTT <u>CTCGAG</u> GCACGTGATTCACTGAGACC        | XhoI  |
| 3975 | TTTT <u>CTAGAC</u> CAGCCATGCTTGCTCGAA          | XbaI  |
| 3976 | TTTT <u>GAATTC</u> CTGGGATGCGTTCCTGTG          | EcoRI |
| 3977 | TTTT <u>CTCGAG</u> TGTTGCCGGTCTTCAGG           | XhoI  |
| 3978 | TTTT <u>CTCGAG</u> ACGTCGACCACATCCTGAAC        | XhoI  |
| 3979 | TTTT <u>CTAGAC</u> AGTCGGCCTCCTTGATCT          | XbaI  |
| 3980 | TTAA <u>CTCGAG</u> GTTCGAGAACAGCAGGTCGT        | XhoI  |
| 3989 | TTTT <u>CCCGGC</u> CGAGATCATCGAGCTGAA          | SmaI  |
| 4056 | <b>CTCGGAATCGGATTC</b> CGCGAC                  | NA    |
| 4057 | <b>AAATCCGATTCCGAGCTGTCGGCCACGATCGATGC</b>     | NA    |
| 4058 | <b>GTTGTCCGACACGATCACCGT</b>                   | NA    |
| 4059 | <b>ATCGTGTCGGACAACGCGCCGGAATCCAGCGCCTC</b>     | NA    |
| 4060 | <b>GTGCATCACCGCGGAAAGCTC</b>                   | NA    |
| 4061 | <b>TCCGCGGTGATGCACACGATCAAGATCAAGGCGCTG</b>    | NA    |
| 4062 | <b>CTGGCCCGTGTGCTTTTCCTT</b>                   | NA    |
| 4063 | <b>AGCAACACGGGCCAGCAGAGCGCGCTGTTCAAGAAG</b>    | NA    |
| 4064 | <b>GTCGAACTCGCTCGCGCCCTT</b>                   | NA    |
| 4065 | <b>GCGAGCGAGTTCGACGGCGATTACGAGATCTCGCGC</b>    | NA    |
| 4066 | <b>TTCGGTGCGCTGATCCATGCGCCGTTTCATCGCGTCG</b>   | NA    |
| 4067 | <b>GATCAGCGCACCGAACGGCGA</b>                   | NA    |
| 4213 | <b>CGCGGCCCGCGGACGTGCGAC</b>                   | NA    |
| 4214 | <b>GTCGCGGCGGCCGCGGACCTCGGCAAGGTGTTTCGAC</b>   | NA    |
| 4215 | <b>GCGCGGCTTGCCGAGGTCGGAG</b>                  | NA    |
| 4216 | <b>CTCGGCAAGCCGCGCGTTCGGCCTGACGCTGCCGCGCTT</b> | NA    |
| 4302 | TTTT <u>CTAGAG</u> GATCCCCGGGTAC               | XbaI  |
| 4303 | TTTT <u>CTAGAG</u> TGCGCGGCTTGCCGAGGTC         | XbaI  |

\*Restriction endonuclease sites incorporated in the oligonucleotide sequences are underlined.

N/A indicates absence of restriction site

Complementary sequences are bolded.

## Plasmids constructions details

*Mutagenesis of B. cenocepacia K56-2 and complementing plasmids*—Unmarked and non-polar deletions were performed as described previously (4). To delete *atsR* (*BCAM0379*) PCR amplifications of regions flanking *atsR* were performed using 3061-3071 and 3060-3062 primer pairs. The amplicons were digested with the restriction enzymes EcoRI-XhoI and XhoI-XbaI, respectively, and cloned into the mutagenic plasmid pGPI-SceI digested with EcoRI and XbaI giving rise to pDelatsR. The deletion of *atsR* was first analyzed by PCR and also confirmed by Southern blot hybridization.

Several deletion plasmids were created using a similar approach and deletions were subsequently performed in *atsR* deleted mutant, *B. cenocepacia* K56-2  $\Delta$ *atsR*. To create pDelT6SS (to delete the entire T6SS gene cluster), amplicons were generated using primers 3778-3779 and 3780-3781 and were digested with XhoI-XbaI and XhoI-EcoRI. To create pDelTU1, pDelTU2 and pDelTU3 (to delete the T6SS Transcriptional Unit #1, #2 and #3, respectively; see *Results*), PCR products were amplified using primers 3457-3944 and 3945-2115; 3949-3950 and 3951-3952; 3947-3948 and 3780-3781, respectively. Amplicons were digested with the appropriate restriction enzymes and cloned into plasmid pGPI-SceI. Each gene within the transcriptional unit #2 was individually deleted. Plasmids pDelbcsM (to delete *BCAL0340*), pDelbcsL<sub>B</sub> (to delete *BCAL0341*), pDelbcsK<sub>C</sub> (to delete *BCAL0342*), pDelbcsI<sub>E</sub> (to delete *BCAL0344*), pDelbcsH<sub>F</sub> (to delete *BCAL0345*), pDelbcsG<sub>G</sub> (to delete *BCAL0346*), pDelbcsF<sub>H</sub> (to delete *BCAL0347*) and pDelbcsE<sub>A</sub> (to delete *BCAL0348*) were created using amplicons generated with primers 3949-3950 and 3966-3967; 3785-3786 and 3787-3788; 3466-3456 and 3468-3470; 3467-3469 and 3483-3485; 3968-3969 and 3970-3971; 3972-3973 and 3974-3975; 3976-3977 and 3978-3979; 3951-3952 and 3980-3989, respectively. Plasmid pDA45 was used to delete *BCAL0343*.

*Bacterial two-hybrid system,  $\beta$ -galactosidase assay and plasmid constructions*—*In vivo* interaction between BcsK<sub>C</sub> and BcsL<sub>B</sub> was investigated using the Bacterial Adenylate Cyclase Two-Hybrid (BACTH) System Kit (Euromedex). This system is based on the interaction-mediated reconstitution of the adenylate cyclase activity in an adenylate cyclase deficient *E. coli* reporter strain (6). The catalytic domain of adenylate cyclase (CyaA) from *Bordetella pertussis* consists of two complementary fragments, T25 and T18 that are not active when physically separated. When these two fragments are fused to interacting polypeptides and co-expressed in *E. coli*, heterodimerization of the hybrid proteins restores the activity CyaA, leading to cyclic AMP synthesis and transcriptional activation of the *lac* operon. Therefore, interaction between two hybrid proteins in *E. coli* will generate high levels of  $\beta$ -galactosidase activity, which can be readily scored on X-gal containing media and quantified.

BcsL<sub>B</sub> and BcsK<sub>C</sub> were fused to the T25 and T18, respectively as follows. The *bcsL<sub>B</sub>* gene was PCR amplified using primer pair 3717-3718 primer pair. The amplicon was digested with BamHI and EcoRI and ligated into pKT25 plasmid similarly digested. The resulting plasmid pT25BcsL<sub>B</sub> encodes a hybrid protein made of BcsL<sub>B</sub> fused to the C-terminus of the T25 fragment (T25-BcsL<sub>B</sub>). *BcsK<sub>C</sub>* and *bcsK<sub>C</sub>*<sub>40-189</sub> genes were first PCR amplified using primer pair 3716-3393. The amplicons were digested with PstI-SacI and ligated into similarly digested pUT18C. The resulting plasmids pT18BcsK<sub>C</sub> and pT18BcsK<sub>C</sub><sub>40-189</sub> encode hybrid proteins made of BcsK<sub>C</sub> or a truncated variant fused to the C-terminal end of T18. *BcsK<sub>C</sub>* and *bcsK<sub>C</sub>*<sub>40-189</sub> were also PCR amplified using primer pair 3716-3719 primer pair. The amplicons were digested with PstI and XbaI and ligated into similarly digested pUT18. The resulting plasmids pBcsK<sub>C</sub>T18, pBcsK<sub>C</sub><sub>40-189</sub>T18, encode hybrid proteins made of BcsK<sub>C</sub> or a truncated variant fused to the N-terminal end of T18.

Sequential 25 amino acids deletions were performed within BcsK<sub>C</sub>. Deletion of amino acids 38 to 62 was performed as follows: DNA sequences encoding amino-acids 2 to 38 and amino acids 63 to 495 were PCR amplified using primer pairs 3716-4056 and 4057-3719, respectively. Primers 4056 and 4057 contain complementary sequences at their 5' extremity. Amplicons were purified using the QiaQuick PCR Purification Kit (Qiagen) according to the manufacturer's recommendations. Fusion PCR was performed using 2  $\mu$ l of each product in a HotStar HiFidelity DNA polymerase containing-reaction mix (Qiagen) with primers 3716-3719. The PCR product was purified, digested with PstI and XbaI, and

ligated into pUT18 plasmid similarly digested giving rise to plasmid pBcsK<sub>C,38-62</sub>T18. Using a similar approach deletions of amino acids 63 to 87, 88 to 112, 113 to 137, 138 to 162, 163 to 187, 188 to 212, 213 to 237 were performed by fusion PCR using amplicons generated with primers 3716-4058 and 4059-3719, 3716-4060 and 4061-3719, 3716-4062 and 4063-3719, 3716-4064 and 4065-3719, 3716-4067 and 4066-3719, 3716-4213 and 4214-3719, 3716-4215 and 4216-3719, respectively, giving rise to plasmids pBcsK<sub>C,63-87</sub>T18, pBcsK<sub>C,88-112</sub>T18, pBcsK<sub>C,113-137</sub>T18, pBcsK<sub>C,138-162</sub>T18, pBcsK<sub>C,163-187</sub>T18, pBcsK<sub>C,188-212</sub>T18 and pBcsK<sub>C,213-237</sub>T18, respectively. Deletions of amino acids 213 to 496 were performed with the Expand long template PCR system (Roche) using primers 4302-4303 and pBcsK<sub>C</sub>T18 as template. PCR products were digested with XbaI and intramolecular ligation was performed giving rise to plasmid pBcsK<sub>C,213-496</sub>T18 expressing the first 212 amino acids from BcsK<sub>C</sub> fused to the N-terminus of T18.

## Supplemental Figures

$\Delta atsR \Delta bcsK_C$  (pBcsK<sub>C</sub>-FLAG)

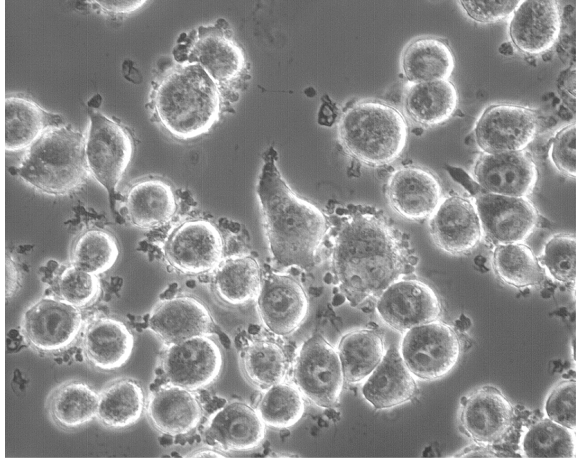

$\Delta atsR \Delta bcsK_C$  (pBcsK<sub>C</sub>Δ40-189-FLAG)

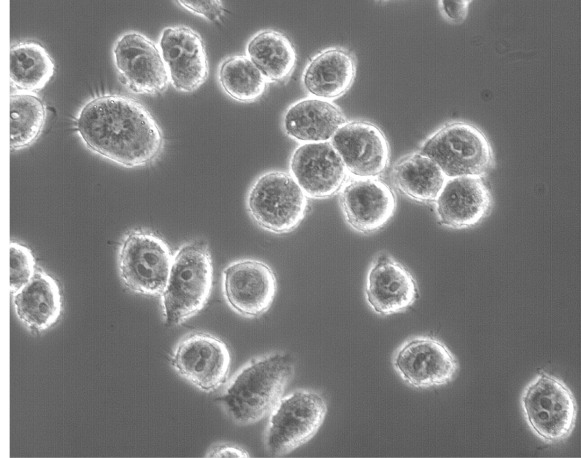

Aubert *et al.*, Figure S1

**Fusion of a FLAG epitope to the N-terminus of BcsK<sub>C</sub> does not alter the protein function.** Phase-contrast microscopy of infected ANA-1 macrophages. The infections were performed at a MOI of 50:1 for 4 h with the following strains: *B. cenocepacia* K56-2  $\Delta atsR \Delta bcsK_C$  (pBcsK<sub>C</sub>-FLAG) and K56-2  $\Delta atsR \Delta bcsK_C$  (pBcsK<sub>C</sub>Δ40-189-FLAG).

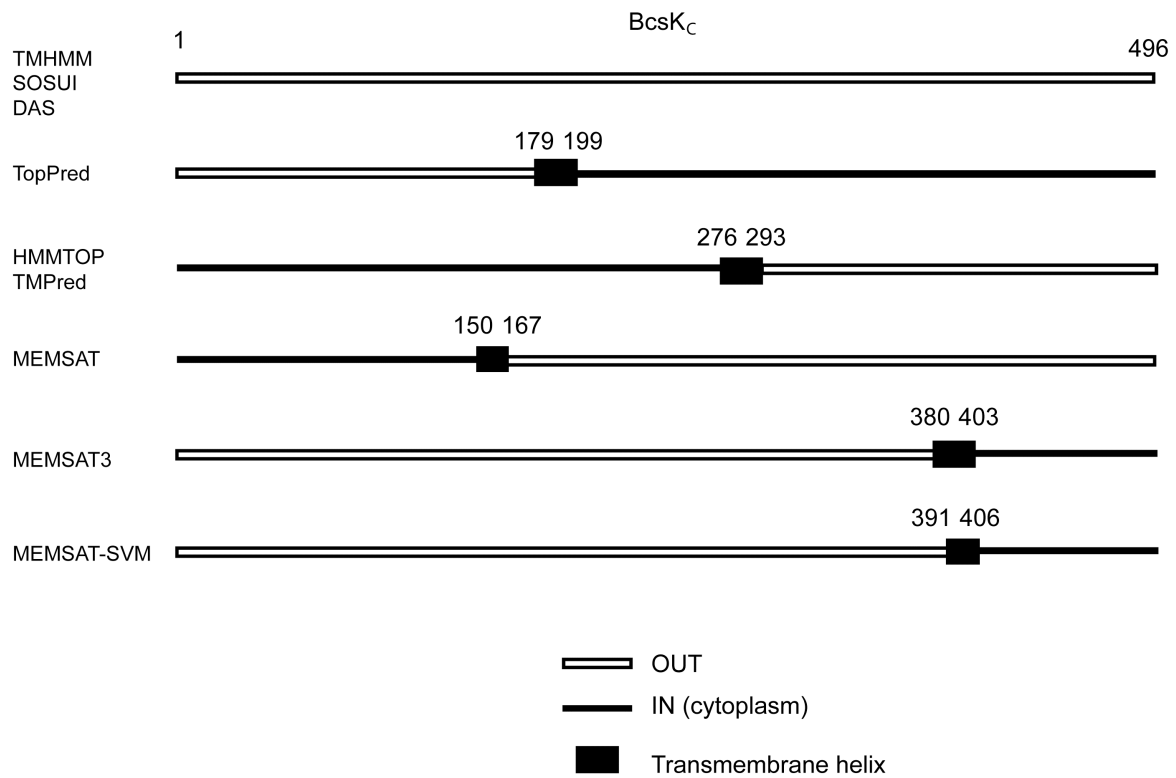

**Aubert *et al.*, Figure S2**

***In silico* analysis of the BcsK<sub>C</sub> protein.** Analyses were done using different transmembrane helices prediction programs available at the ExPASy Proteomics (<http://www.expasy.ch>) and PSIPRED servers (<http://bioinf4.cs.ucl.ac.uk:3000/psipred/>) (7,8).



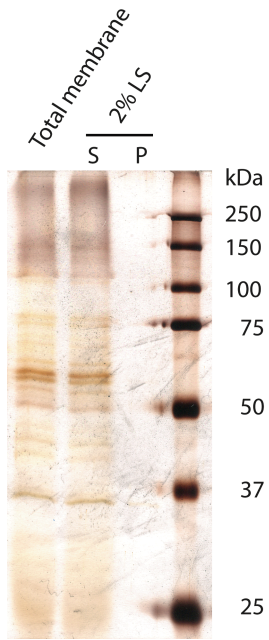

**Aubert *et al.*, Figure S3**

**Protein solubilization with 2% *N*-lauroylsarcosine (LS).** Insoluble (Pellet, P) and soluble (Supernatant, S) fractions were loaded on a 12% SDS-PAGE gel and silver stained. The protein profiles from untreated total membrane and from soluble fraction are identical while no protein can be detected in the pellet fraction, suggesting that treatment of *B. cenocepacia* membrane with 2% *N*-lauroylsarcosine for 1h in ice leads to the solubilization of both inner and outer membrane.

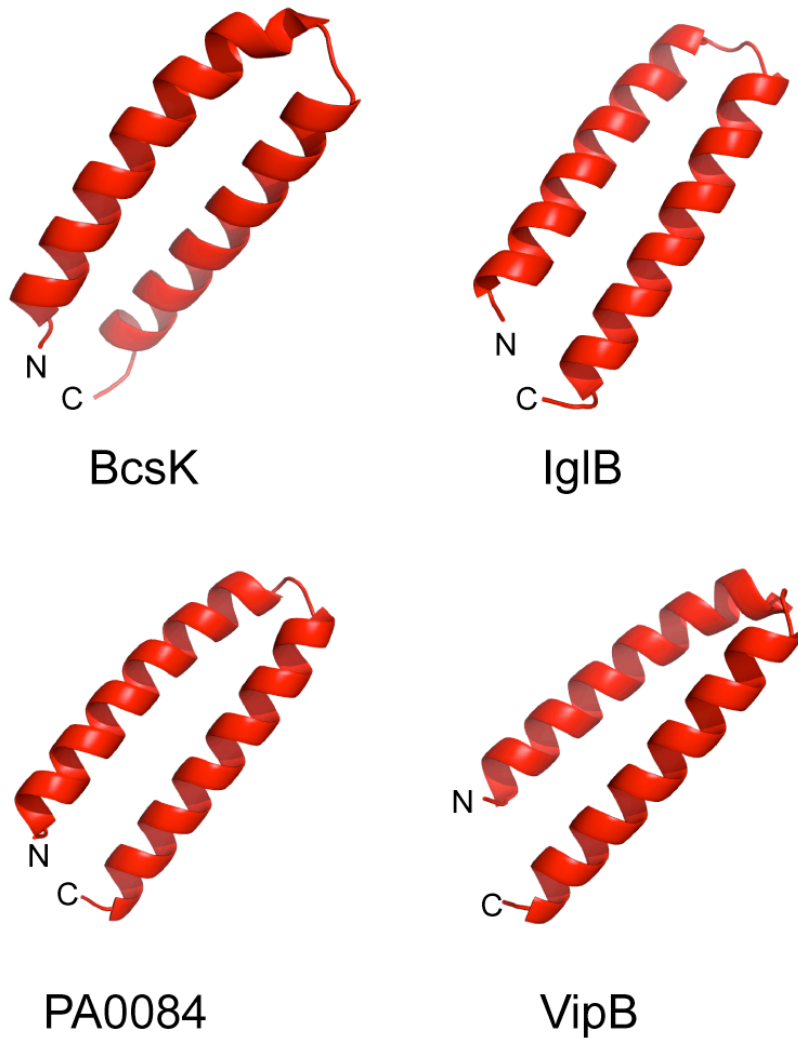

Aubert *et al.*, Figure S4

*Ab initio* models of the region required for binding to BcsL<sub>B</sub> (residues 63-112 in BcsK<sub>C</sub>) in BcsK<sub>C</sub> homologs. These include IglB from *F. novicida*, VipB from *V. cholerae*, and PA0084 from *P. aeruginosa*. Structural modeling was performed with the I-TASSER server (<http://zhang.bioinformatics.ku.edu/I-TASSER/>). A similar fold consisting of paired  $\alpha$ -helices is predicted in all cases.

## REFERENCES TO SUPPLEMENTAL DATA

1. Mahenthiralingam, E., Coenye, T., Chung, J. W., Speert, D. P., Govan, J. R., Taylor, P., and Vandamme, P. (2000) *J Clin Microbiol* 38, 910-913
2. Miller, V. L., and Mekalanos, J. J. (1988) *J Bacteriol* 170, 2575-2583
3. Aubert, D. F., Flannagan, R. S., and Valvano, M. A. (2008) *Infect Immun* 76, 1979-1991
4. Flannagan, R. S., Linn, T., and Valvano, M. A. (2008) *Environ Microbiol* 10, 1652-1660
5. Figurski, D. H., and Helinski, D. R. (1979) *Proc Natl Acad Sci U S A* 76, 1648-1652
6. Karimova, G., Pidoux, J., Ullmann, A., and Ladant, D. (1998) *Proc Natl Acad Sci U S A* 95, 5752-5756
7. Jones, D. T. (1999) *J Mol Biol* 292, 195-202
8. McGuffin, L. J., Bryson, K., and Jones, D. T. (2000) *Bioinformatics* 16, 404-405
